# Supplementary material for: (2-Methylpiperidine)PbI3: an ABX3-type organic–inorganic hybrid chain compound and its semiconducting nanowires with photoconductive properties
Source: Royal Society of Chemistry journal article supplement (doi:10.1039/c7tc03844e), 2017-01-01
Supplement: c7tc03844e1.pdf [file c7tc03844e1.pdf]

## Supporting information

### **(2-methylpiperidine)PbI<sub>3</sub>: an ABX<sub>3</sub>-type organic-inorganic hybrid chain compound and its semiconductive nanowires with photoconductive performances**

*Zhenyue Wu<sup>ab</sup>, Chengmin Ji<sup>a</sup>, Sasa Wang<sup>ab</sup>, Weichuan Zhang<sup>a</sup>, Yuyin Wang<sup>ab</sup>, Lina Li<sup>\*a</sup>, Sangen Zhao<sup>a</sup>, Zhihua Sun<sup>a</sup>, Junhua Luo<sup>\*a</sup>*

<sup>a</sup> State Key Laboratory of Structural Chemistry, Fujian Institute of Research on the Structure of Matter, Chinese Academy of Sciences, Fuzhou, Fujian, 350002, P. R. China

<sup>b</sup> University of Chinese Academy of Sciences, Chinese Academy of Sciences, Beijing 100039, P. R. China

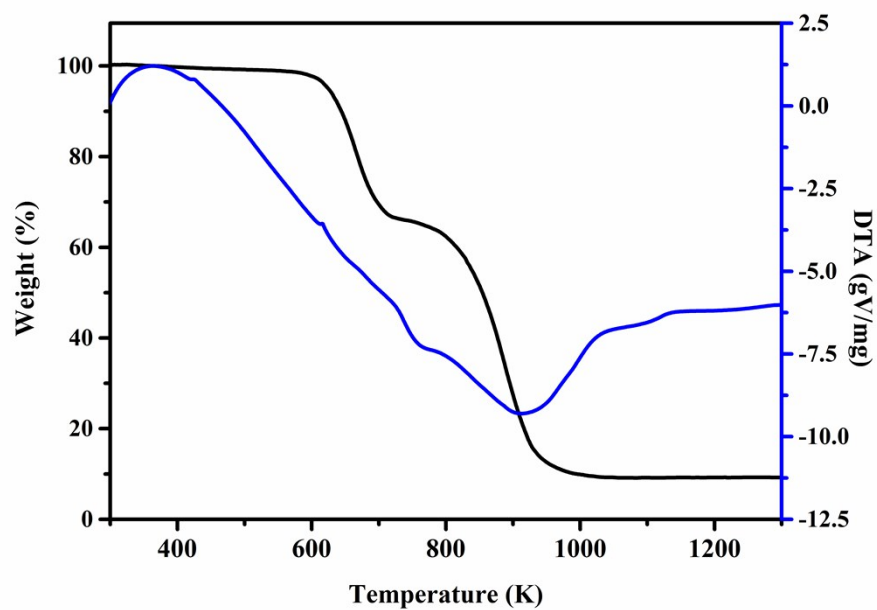

**Figure S1:** TGA curve of **1** was measured, which show that **1** maintains thermal stability until 610 K.

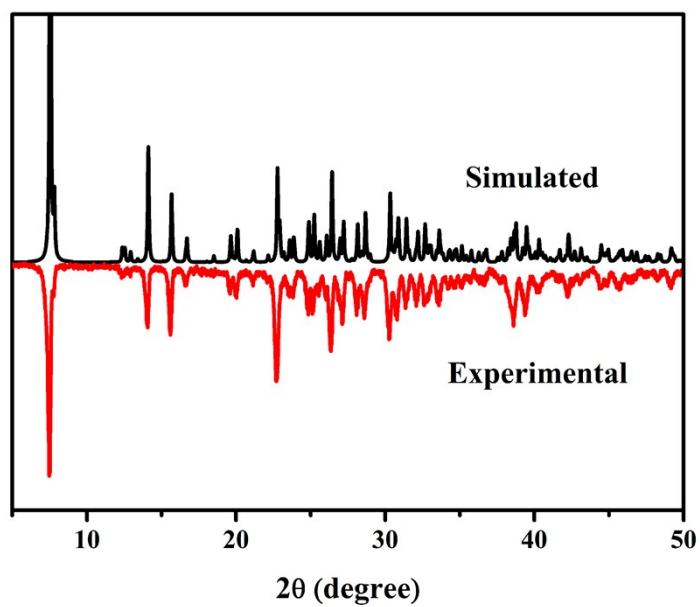

**Figure S2:** Experimental and simulated powder X-ray diffraction patterns of **1**.

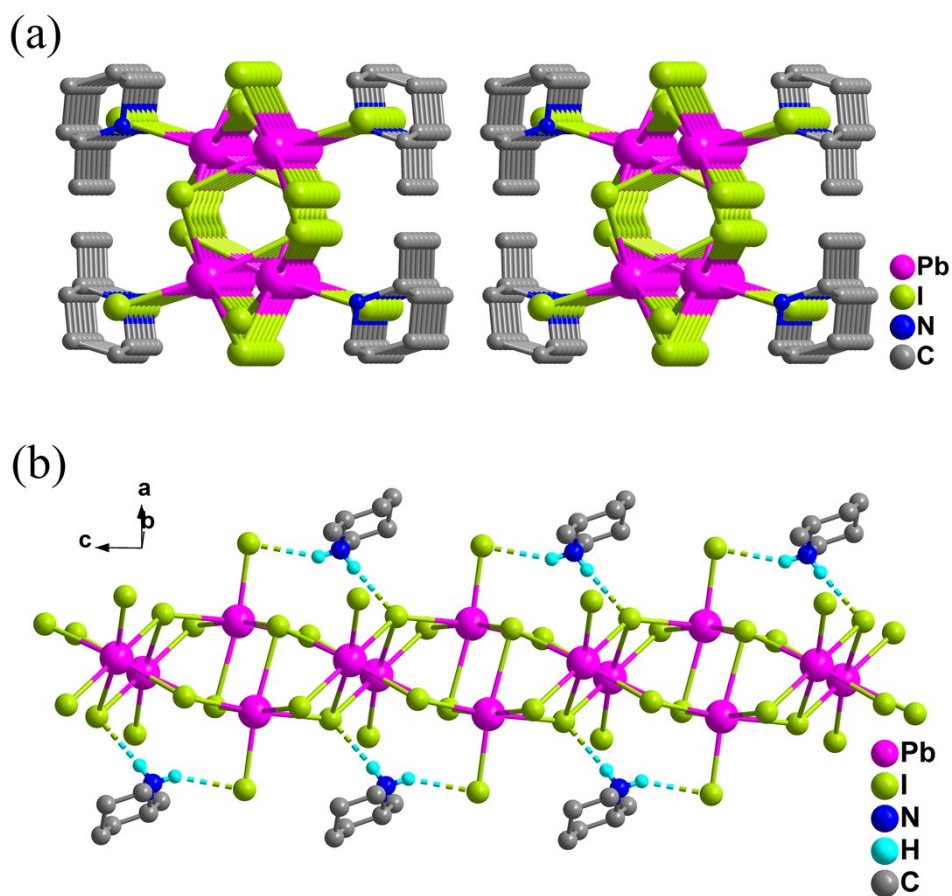

**Figure S3:** (a) 1D infinite double chains are surrounded by organic cations to form quantum wire structure. (b) The N-H...I hydrogen-bonding interactions of **1** were showed. There are two different lengths of hydrogen bonds between donor (N) and acceptor (I), one bond length is 3.5675 Å by connecting N and terminal I, and the other is 3.6021 Å by interacting N and triple bridged I. (In order to clearly express the hydrogen bond, some hydrogen atoms were removed).

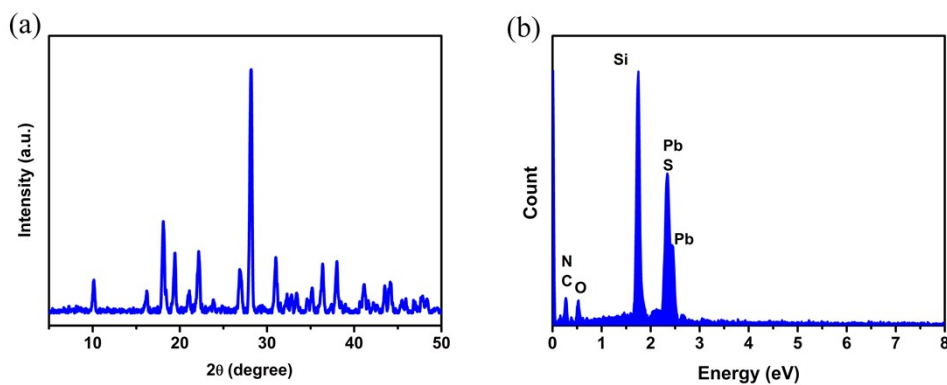

**Figure S4:** (a) Powder X-ray diffraction pattern of the precursor NWs. (b) energy dispersive X-ray spectroscopy of the precursor NWs on Si substrate.

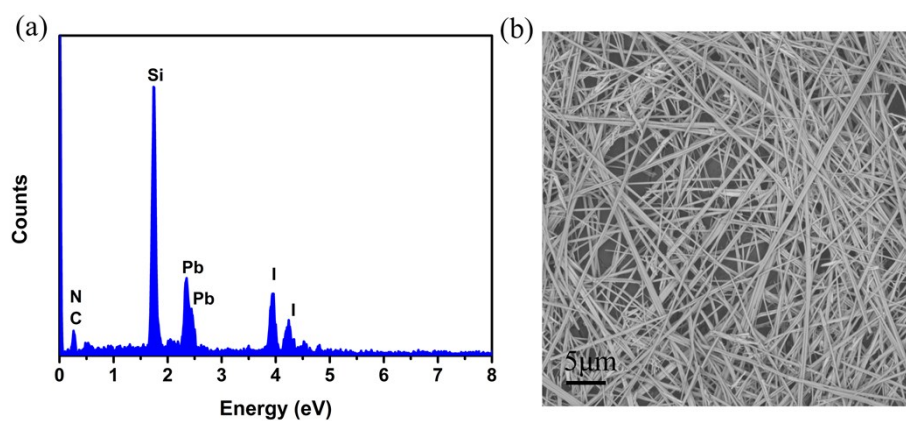

**Figure S5:** (a) Energy dispersive X-ray spectroscopy of the prepared NWs on Si substrate. (b) SEM image of the prepared NWs.

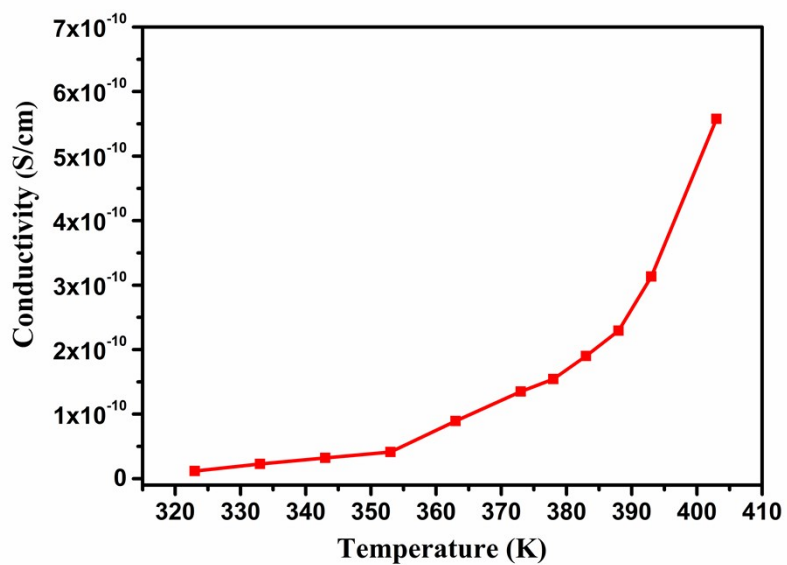

**Figure S6:** Temperature-dependent conductivity of 1.

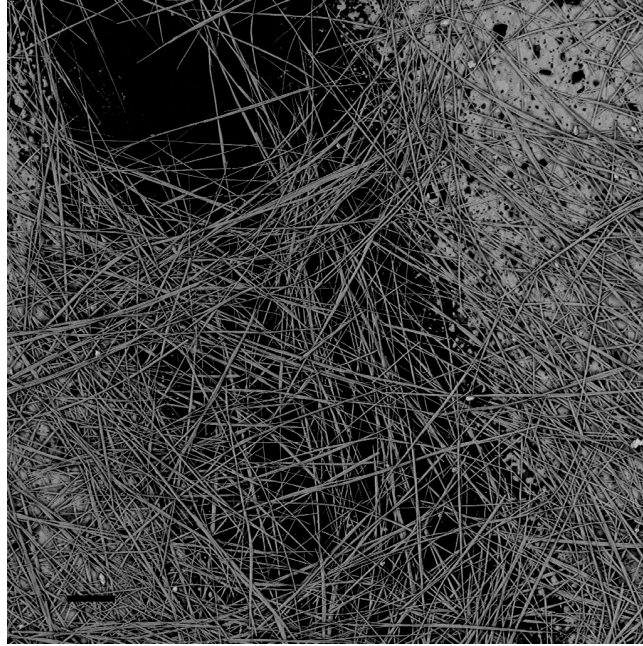

**Figure S7:** SEM image of hybrid NWs in gold interdigital electrode. Scale: 20  $\mu\text{m}$

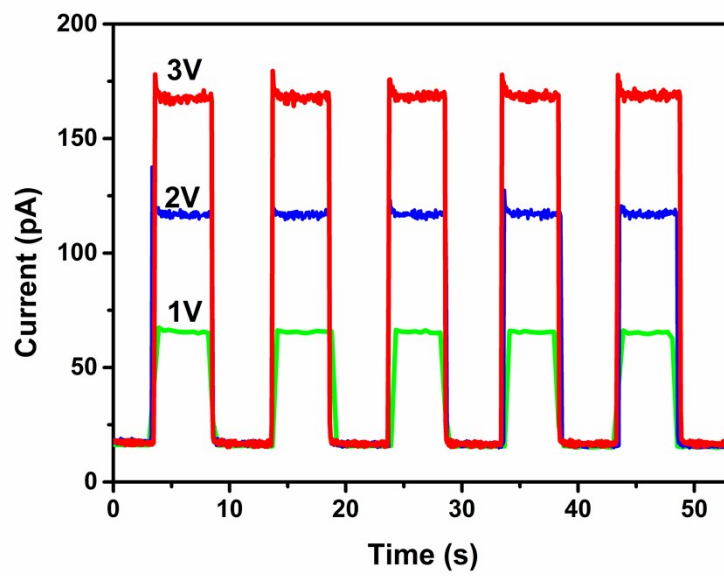

**Figure S8:** Photoreponse of the prepared nanowires at bias of 1, 2, 3V, respectively.

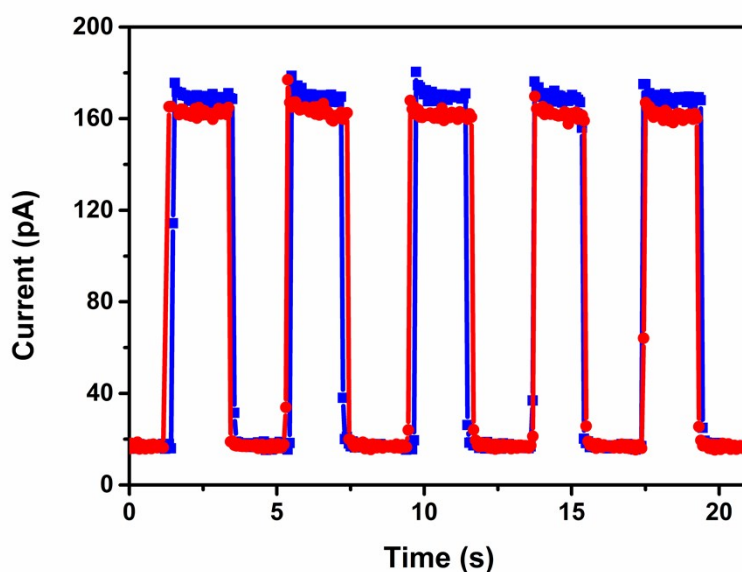

**Figure S9:** Photoreponse of the as-prepared nanowires (blue line) and after 3 weeks of storage in ambient condition (red line).

**Table S1:** Crystal data and structural refinement details of **1** at 293 K.

|                                                                                                                       |                                                                                                                                               |
|-----------------------------------------------------------------------------------------------------------------------|-----------------------------------------------------------------------------------------------------------------------------------------------|
| Empirical formula                                                                                                     | C <sub>6</sub> H <sub>14</sub> NPb I <sub>3</sub>                                                                                             |
| Formula weight                                                                                                        | 688.07                                                                                                                                        |
| Temperature                                                                                                           | 293K                                                                                                                                          |
| Crystal system, space group                                                                                           | Orthorhombic, <i>Pbcn</i>                                                                                                                     |
| Unit cell dimensions                                                                                                  | $a = 13.6826(4) \text{ \AA}$<br>$b = 22.5930(7) \text{ \AA}$<br>$c = 9.0276(3) \text{ \AA}$<br>$\alpha = 90$<br>$\beta = 90$<br>$\gamma = 90$ |
| Volume                                                                                                                | 2790.71(15) $\text{\AA}^3$                                                                                                                    |
| Z, Calculated density                                                                                                 | 8, 3.275 g/cm <sup>3</sup>                                                                                                                    |
| <i>F</i> (000)                                                                                                        | 2384                                                                                                                                          |
| Limiting indices                                                                                                      | $-17 \leq h \leq 12$<br>$-21 \leq k \leq 28$<br>$-11 \leq l \leq 11$                                                                          |
| Reflections collected / unique                                                                                        | 9525/2849                                                                                                                                     |
| Completeness                                                                                                          | 99.70 %                                                                                                                                       |
| Data / restraints / parameters                                                                                        | 2849/0/102                                                                                                                                    |
| Final <i>R</i> indices [ $I > 2\sigma(I)$ ]                                                                           | $R_1 = 0.0255$ , $wR_2 = 0.0437$                                                                                                              |
| <i>R</i> indices (all data)                                                                                           | $R_1 = 0.0343$ , $wR_2 = 0.0466$                                                                                                              |
| $aR_1 = \Sigma   F_o  -  F_c   / \Sigma  F_o $ , $wR_2 = \{\Sigma [w(F_o^2 - F_c^2)^2] / \Sigma w[(F_o)^2]^2\}^{1/2}$ |                                                                                                                                               |
